## **Tumor-educated uncommitted hematopoietic stem cells promote a metastatic switch**

Ksenia Magidey-Klein<sup>1</sup>, Ksenya Kveler<sup>2</sup>, Tim J. Cooper<sup>1,2</sup>, Rachelly Normand<sup>2</sup>, Tongwu Zhang<sup>3</sup>, Michael Timaner<sup>1</sup>, Ziv Raviv<sup>1</sup>, Brian James<sup>4</sup>, Roi Gazit<sup>5</sup>, Ze'ev A. Ronai<sup>4</sup>, Shai S. Shen-Orr<sup>2,6</sup>, Yuval Shaked<sup>1,\*</sup>.

### **Affiliation**

1. Department of Cell Biology and Cancer Science, Rappaport Faculty of Medicine, Technion Integrated Cancer Center, Technion, Haifa, Israel
2. Faculty of Medicine, Technion-Israel Institute of Technology, Haifa, Israel
3. Division of Cancer Epidemiology and Genetics, Laboratory of Translational Genomics, National Cancer Institute, Bethesda, MD
4. Sanford Burnham Prebys Medical Discovery Institute, San Diego, CA
5. National Institute for Biotechnology in the Negev, Ben-Gurion University of the Negev, Beer-Sheva, Israel
6. Faculty of Biology, Technion-Israel Institute of Technology, Haifa, Israel

**Running title:** Tumor-educated HSCs promote metastasis

### **\*Correspondence**

Yuval Shaked

Technion Integrated Cancer Center

Faculty of Medicine

Technion

Haifa, Israel

Office: 972-4-829-5215

Lab: 972-4-829-5238

Email: [yshaked@technion.ac.il](mailto:yshaked@technion.ac.il)

## **Abstract**

Myeloid skewing of hematopoietic cells is a prominent promoter of metastasis. However, the reservoir of these cells in the bone marrow (BM) compartment, their education, immune memory and their differentiation pattern from uncommitted hematopoietic stem cells (HSCs) have not been explored. Here we show that metastatic tumors dictate a unique differentiation pattern of uncommitted HSCs towards myeloid progeny. Single cell RNA-sequencing analysis integrated with proteomic screen of tumor secretome revealed that HSCs differentiate into monocyte-dendritic progenitors (MDP) in highly metastatic tumors but not in low-metastatic tumors which display HSC differentiation into granulocyte-monocyte progenitors (GMP). This effect is driven by IL-6/IL-6R axis which is highly active in metastatic tumors. Consequently, loss and gain of function of IL-6 in tumor cells resulted in decreased and increased metastasis and corresponding MDP levels, respectively. Consistently, MDPs but not GMPs obtained from highly metastatic tumors, adoptively transferred into mice bearing tumors resulted in increased metastasis. Our study reveals a unique tumor-BM crosstalk that dictates a specific long-lived education of HSCs towards myeloid differentiation, thereby promoting the enrichment of metastasis-associated immune cells in the tumor microenvironment.

## Introduction

Despite recent advances in cancer therapies, metastasis remain mostly incurable, accounting for the majority of cancer-related mortalities. Metastasis is a multistep process that involves dissemination of cancer cells from the primary tumor mass, intravasation into blood circulation, seeding and subsequent growth at distant sites (Mehlen and Puisieux, 2006). Successful colonization of tumor cells at distant sites relies, in part, on bone marrow derived cells (BMDCs) that are recruited earlier than tumor cells to the distant sites where they contribute to the formation of a pre-metastatic niche (Kaplan et al., 2005; Wang et al., 2019).

As a systemic disease, tumors exploit the bone marrow (BM) niche as a source of tumor-promoting stromal cells. These include immunosuppressive macrophages and myeloid derived suppressor cells (MDSCs) that support tumor growth and metastasis by different mechanisms (Doak et al., 2018; Gabrilovich, 2017). The immune cells within tumors all originate from hematopoietic stem cells (HSCs). HSCs are sensitive to external stimuli, such as infection or injury. In response, they enter an extensive proliferative phase, in order to increase the reservoir of required immune cells, often at the expense of other leukocytes. Once the stimulus ceases, HSCs return to a quiescent stage (Hoggatt et al., 2016). However, the crosstalk between HSCs and tumor cells which promotes their differentiation has not been fully explored.

It is well established that tumors induce myelopoiesis as a means of supplying immature progenitors that act as immunosuppressive cells. A recent study demonstrated that the composition of circulating HSCs is significantly altered in patients with solid tumors, with increased levels of granulocyte-monocyte progenitors (GMPs) and a general bias towards granulocyte formation (Wu et al., 2014). In addition, elevated numbers of circulating HSCs correlate with tumor progression and decreased overall survival (Wildes et al., 2019; Wu et al., 2014). Moreover, it has been suggested that tumor-mediated signals directly affect the fate of HSCs, leading to their differentiation into MDSCs that help form a pre-metastatic niche (Gabrilovich et al., 2012; Wang et al., 2019). However, the specific interactions between highly metastatic tumor cells and HSC differentiation to promote metastasis, have not been elucidated.

Here we show that highly metastatic tumors regulate HSC fate, shifting their differentiation pattern towards tumor and metastasis supporting cells. HSC differentiation induced by highly metastatic tumors, is dictated by IL-6 signaling. This crosstalk leads to increased levels of monocyte-dendritic progenitors (MDPs) that further give rise to a specific macrophage phenotype, ultimately promoting metastasis.

## Methods

### Tumor cell cultures

The 4T1 murine breast carcinoma cell line and B16-F1 and B16-F10 murine melanoma cell lines were purchased from the American Type Culture Collection (ATCC, Manassas, VA, USA). Cells were used within 6 months of resuscitation. 67NR murine breast carcinoma cells were kindly provided by Prof. Sleeman (Menheim, Germany). 4T1 and 67NR cell lines have the same genetic background, and represent cells with high and low metastatic potential, respectively, as previously described (Schmaus and Sleeman, 2015). The cells were grown in Dulbecco's modified Eagle's medium (DMEM, SigmaAldrich, Rehovot, Israel). B16-F10 and B16-F1 cells represent cells with high and low metastatic potential, respectively, as previously described (Ishiguro et al., 1996). For overexpression of IL-6, B16-F1 cells were transfected with 1 µg DNA of pCMV3 vector encoding IL-6 or the empty control pCMV3 vector (EV) using PolyJet (SigmaGen Laboratories, MD, USA) following the manufacturer's instructions. For generating stable clones, transfected cells were grown for two weeks with hygromycin (250µg/ml). Conditioned medium obtained after 24 hours was analyzed for IL-6 levels using ELISA. Cell proliferation of IL-6 overexpressing cells was carried out by XTT, as previously described (Chang et al., 2020). Cells were grown in Roswell Park Memorial Institute medium (RPMI, SigmaAldrich) and supplemented with 1.5% non-essential amino acids, 0.75 % MEM vitamins and 1.5 % sodium bicarbonate. All cell media were supplemented with 5% fetal calf serum (FCS), 1% L-glutamine, 1% sodium pyruvate, and 1% Pen-Strep-Neomycin in solution (purchased from Biological Industries, Israel). The cells were cultured in a humidified chamber in 5% CO<sub>2</sub> at 37°C. Cells were routinely tested for mycoplasma and found to be mycoplasma-free.

### Animals

Female BALB/c and C57BL/6 mice (8-10 weeks of age) were purchased from Envigo (Israel) or Jackson laboratories (Bar Harbor ME, USA). For bone marrow transplantation, co-inoculation and adoptive transfer experiments, transgenic C57BL/6 mice expressing enhanced-GFP under the regulation of the ubiquitin promoter were used (B6-EGFP, The Jackson Laboratory, Bar Harbor, ME). The Animal Care and Use Committees of the Technion (Haifa, Israel) and Sanford Burnham Prebys (San Diego, CA) approved all animal studies and experimental protocols.

### Murine tumor models

4T1 and 67NR cells (5x10<sup>5</sup> cells in 50 µl serum free medium) were orthotopically implanted in the mammary fat pad of BALB/c female mice. B16-F1 and B16-F10 cells (5x10<sup>5</sup> cells in 200 µl serum free

medium) were subdermally implanted into the flanks of C57BL/6 mice. Tumor volume was measured twice a week with Vernier calipers and calculated according to the formula  $\text{width}^2 \times \text{height} \times 0.5$ . When tumor size reached approximately 1500 mm<sup>3</sup> (endpoint), mice were sacrificed and tumor, lungs and femurs were removed. Blood was drawn by cardiac puncture prior to mice euthanasia.

In some experiments, mice were treated with anti-IL-6 antibodies (20mg/kg, MP5-20F3 clone, BioXCell, NH, USA) or IgG control antibodies (20mg/kg, Clone MP5-20F3), twice weekly, as previously described<sup>12</sup>. Twenty-four hours after the last injection, the mice were sacrificed for further pathological and cellular analysis.

In co-inoculation experiments, Lineage negative (Lin<sup>-</sup>) cells (100,000 cells/mouse) or Lin-Sca1+Kit+ (LSK) cells (25,000 cells/mouse) obtained from bone marrow of tumor-free GFP-expressing mice were mixed with B16-F1 or B16-F10 cells in Matrigel (BD Biosciences, CA, USA) and subdermally implanted into the flanks of C57BL/6 mice. Lin<sup>-</sup> and LSK cells mixed with Matrigel alone were used as control groups in order to evaluate spontaneous differentiation in Matrigel plugs. Lin<sup>-</sup> cells were purified using the MagCelect Mouse Hematopoietic Cell Lineage Depletion Kit (R&D, MN, USA). LSK cells were sorted using FACSAria™ IIIu (BD Biosciences, CA, USA). Mice were sacrificed 14 days (for Lin<sup>-</sup>) and 10 days (for LSK) after implantation, and tumors were removed.

### **Flow cytometry acquisition and analysis**

Lungs and tumors were prepared as single cell suspensions as previously described<sup>13</sup>. Bone marrow cells were flushed from the bone marrow and peripheral blood was collected either by retro-orbital bleed or cardiac puncture. Cells were immunostained with specific antibodies against surface markers to define various cell types listed in Table S1. Conjugated monoclonal antibodies were purchased from BD Biosciences (San Jose, CA) or BioLegend (San Diego, CA). Sca1(D7)-PE/BV786, CD117(2B8)-APC, CD34(HM34)-PE, IL-7R(A7R34)-PE-Cy7, Flt3(A2F10)-PE-Cy5, F4/80(BM8)-PE, CD11b(M1/70)-PerCP, Gr-1(RB6 8C5)-BV510, FCγR(93)-BV510, CD115(AFS98)-PeCy7, CD206(C068C2)-BV421, CD11c(N418)-APC-Cy7, Ly6C(1A8)-BV605, Ly6G(HK1.4)-BV510, CD3ε(30-F11)-Alexa Fluor 700, B220(RA3-6B2)-BV605 and lineage cocktail (17A2/RB6-8C5/RA3-6B2/Ter 119/M1/70)-Alexa Fluor 700 or BV421. For phospho-STAT3 (p-STAT3) analysis, naïve bone marrow cells were stimulated first with escalating doses of IL-6 for 30 minutes at 37°C, and subsequently were immunostained for MDPs. Right after, the cells were fixed in 1.6% paraformaldehyde and permeabilized in ice-cold 90% ethanol. Cells were immunostained with p-STAT3 (Tyr705)-AF488 at 4 °C for 40 minutes. At least 500,000 events were acquired for each sample using BD LSRFortessa cytometer and analyzed with FlowJo 10.2 software.

### **Bone marrow transplantation**

Donor GFP-expressing mice were inoculated with either B16-F1 or B16-F10 tumor cells. At endpoint, the mice were sacrificed and bone marrow cells were obtained by flushing the femur and tibia with PBS. Lineage depletion kit (R&D, MN) was used to purify immature cells. Enriched cells were immunostained and sorted for Lin<sup>-</sup> or LSK ( $1 \times 10^5$  and  $5 \times 10^3$  cells, respectively), and subsequently intravenously transplanted into recipient lethally irradiated mice (10 Gy in 8 min, single dose) together with supportive total bone marrow cells ( $1 \times 10^6$  cells/mouse), obtained from naïve (non-GFP) C57BL/6 mice. Recipient mice exhibiting less than 1% total chimerism were considered as failed transplantations and excluded from the analysis. Reconstitution recovery of GFP<sup>+</sup> donor cells was tested following 16 weeks, by collecting the blood from the retro-orbital venous plexus.

### **MDP Adoptive transfer**

GFP-expressing mice were implanted with B16-F10 tumor cells, and then treated with anti-IL-6 or IgG control antibodies, as described above. Lin<sup>-</sup> cells were purified from the bone marrow using a lineage depletion kit (R&D, MN) and immunostained for MDP sorting. MDPs ( $1 \times 10^3$  cells) were intravenously injected to naïve C57BL/6 mice, which were subsequently implanted with B16-F1 tumor cells. When the tumors reached endpoint, the mice were sacrificed and MDP differentiation was evaluated by analyzing the GFP<sup>+</sup> cells using flow cytometry. Lungs were harvested and subjected to histopathological staining for metastasis scoring.

### **Mass cytometry acquisition and analysis**

High throughput mass-cytometry (CyTOF) analysis was performed as previously described (Shaked et al., 2016). Briefly, tumors were prepared as single cell suspensions. Cells were pooled ( $3 \times 10^6$ ) and immunostained with a mixture of metal-tagged antibodies using the different surface markers as indicated in Table S2. All antibodies were conjugated using the MAXPAR reagent (Fluidigm, CA, USA) and titered prior to staining. Rhodium and iridium intercalators were used to identify live/dead cells. Cells were washed twice with PBS, fixed in 1.6% formaldehyde (SigmaAldrich, MO, USA), washed again in ultrapure H<sub>2</sub>O, and acquired by CyTOF mass cytometry system (Fluidigm, CA, USA). Acquired data was uploaded to Cytobank web server (Cytobank Inc.). CD11b<sup>+</sup> myeloid live cells were used for the analysis, and the gated cells were segregated into sub-population clusters by expression markers. Data analysis

was performed by viSNE algorithm (Amir el et al., 2013), via the Cytobank server. Changes in specific populations were validated by flow cytometry.

### **Colony forming assay**

For mouse colony forming units (CFU), red blood cells were lysed from peripheral blood of tumor-free or tumor-bearing mice. The cells were then seeded in triplicates at a concentration of 100,000 cells/well into 6-well culture plates with M3434 methylcellulose (Methocult, Stem Cell Technologies, Vancouver, Canada). For assessing the differentiation pattern of naïve bone marrow cells and MDPs in the presence of tumor-derived conditioned medium (TCM), incomplete methylcellulose medium M3431 (Stem Cell Technologies, Vancouver, Canada) was supplemented with 30% TCM obtained from  $5 \times 10^6$  total tumor cells after they were adjusted to culture for 24 h in serum free medium. BM cells (10,000 cells/well) and sorted MDP cells (50 cells/well) were plated for 12 days. Plates were imaged with a Zeiss microscope and colonies were scored.

### **Single cell RNA sequencing and data analysis**

LSK cells were sorted from bone marrow of met-low and met-high melanoma tumor bearing mice based on expression markers defined in Table S1. Briefly, LSK cells were sorted into two 384-well plates (Biorad Laboratories), one for each group, containing RT mix, and barcoded 3' RT primer, in nuclease-free water. The plates were kept at  $-80^{\circ}\text{C}$  until analyzed. Single cell RNA sequencing (scRNA-seq) was performed at the New York University Genome Center. On the day of library preparation, plates were removed from  $-80^{\circ}\text{C}$  and placed in the thermal cycler for thaw, lyse and annealing purposes (Hold for  $22^{\circ}\text{C}$ , 22C for 2 min,  $72^{\circ}\text{C}$  for 3 min, Hold at  $4^{\circ}\text{C}$ ). After the program ended, 2  $\mu\text{l}$  of RT Mix 2 [each reaction consisting of 0.5  $\mu\text{l}$  5' Custom TSO Primer 10  $\mu\text{M}$  (IDT Technologies), 0.925  $\mu\text{l}$  5M Betaine (ThermoFisher Scientific), 0.4  $\mu\text{l}$  100 mM  $\text{MgCl}_2$  (Sigma Aldrich, CA, USA), 0.125  $\mu\text{l}$  Superase In RNase Inhibitor 20 U/  $\mu\text{l}$  (Invitrogen), and 0.05  $\mu\text{l}$  Maxima H Minus RT enzyme (200 U/  $\mu\text{l}$ )] was added to each well and samples were sealed and then mixed using the Eppendorf thermomixer at 2000 RPM for 30 seconds at room temperature. The plates were briefly centrifuged at 2000 RPM for 30 seconds at  $4^{\circ}\text{C}$ . Plates were then placed in the thermal cycler for the Maxima\_RT program (Hold at  $50^{\circ}\text{C}$ ,  $50^{\circ}\text{C}$  for 94 minutes,  $85^{\circ}\text{C}$  for 5 minutes, Hold at  $4^{\circ}\text{C}$ ). After the RT program, each sample was treated with 7  $\mu\text{l}$  cDNA PCR Master mix [each reaction consisting of 0.25  $\mu\text{l}$  10  $\mu\text{M}$  IS-PCR Primer Mix (IDT Technologies), 0.5  $\mu\text{l}$  molecular grade water, and 6.25  $\mu\text{l}$  2X KAPA Hifi ReadyMix (Roche)]. Samples were mixed on the thermomixer at 2000 RPM for 30 seconds at RT, and centrifuged briefly at 2000 RPM for 30 seconds at  $4^{\circ}\text{C}$ . Plates were placed in the thermal cycler for 3-Step cDNA

amplification (Hold at 98°C, 13 cycles of [98°C for 15 sec; 75°C for 20 sec; 72°C for 6 min], 5 cycles of [98°C for 15 sec; 72°C for 20 sec; 72°C for 6 min], 13 cycles of [98°C for 15 sec; 67°C for 20 sec; 72°C for 6 min], 72°C for 5 minutes, Hold at 4°C). After cDNA amplification, samples were stored at 4°C until ready for cDNA pooling and cleanup. The pools were first cleaned with a 0.7X SPRISelect bead cleanup followed by a 0.6X SPRISelect bead cleanup and eluted in 25 µl elution buffer. Pooled cDNA was quantified with Qubit HS DNA (Invitrogen) and Fragment Analyzer HS-NGS (Agilent). Pooled and purified cDNA (600 pg) was taken into Nextera XT (Illumina) library prep and tagmented according to the manufacturer's instructions. The samples were given custom P7 and P5 adapters (10 uM, 1 µl for each adapter) and amplified using a modified NXT\_scRNA PCR program (Hold at 95°C, 95°C for 30 seconds, 13 cycles of [95°C for 10 seconds, 55°C for 30 seconds, 72°C for 30 seconds], 72°C for 5 minutes, Hold at 4°C). Each final library was quantified with Qubit HS DNA (Invitrogen) and Fragment Analyzer HS-NGS (Agilent), and then diluted to 2 nM. The libraries were loaded at a concentration of 8.5 pM on a HiSeq Rapid Run with run cycles of 26x9x9x76 and were compiled into a digital gene expression matrix used for downstream analyses.

For data filtering and clustering, Seurat R package v3.00 (Butler et al., 2018) was used. Cells with less than 1000 non-zero genes were filtered out; genes expressed in less than 3 cells and non-coding genes were omitted. Outlier cells with more than 5% of expressed genes coming from mitochondria were removed from the analysis, as high mitochondrial expression likely indicates cells undergoing apoptosis. Altogether, the filtered data contained 758 cells and 13,997 genes. Following log-normalization, the top 2000 variable genes were identified and used to find Louvain clusters using the default resolution of 0.8, as well as resolution set to 1 to obtain a larger number of communities. Top 17 significant principal components were selected with the JackStraw method and used to compute t-stochastic neighbor embedding (t-SNE) plots. To annotate individual cells with main cell types, we applied the SingleR package v0.22 (Aran et al., 2019), using ImmGen gene expression compendium (Heng et al., 2008) as the reference dataset. This resulted in the most likely cell type being inferred for each single cell independently, in an unsupervised manner, based on the expression profile of the cell. Annotation significance p-values were computed using SingleR built-in chi-squared outlier test for the top-scored cell type match. The resulting cellular origins were used to calculate cell type proportions in bone marrow and compare them between met-high and met-low mice. For determining proportion difference significance, the bias-corrected and accelerated (BCa) bootstrap method for independent two-samples was applied, together with one-sided hypothesis testing, using wBoot R Package v1.0.3. Differential gene expression analysis and gene set enrichment analysis (GSEA) was performed using MAST (Finak et al., 2015), a package suited to analysis



of sparse scRNA-seq, and clusterProfiler (Yu et al., 2012), respectively. GSEA reference signatures were obtained from MSIGDB (Liberzon et al., 2015) (v7.1 - Hallmark (H), Regulatory Target Gene Sets (C3)).

### **Cytokine array and ELISA**

Tumor derived conditioned medium (TCM) was obtained from  $5 \times 10^6$  total tumor cells that underwent single cell suspension and subsequently cultured for 24 h in serum-free medium. TCM from met-low or met-high B16 melanoma tumors were applied to a proteome profiler mouse XL cytokine array (ARY028, R&D, MN) in accordance with the manufacturer's instruction. The signals corresponding to each factor in the array were quantified by densitometry analysis. The ratio between the levels of the various factors in met-high and met-low TCM was calculated. IL-6 levels in TCM of met-low and met-high melanoma and breast carcinoma tumors were quantified using a specific enzyme-linked immunosorbent assay (ELISA) kit (ab46100, Abcam, US). The ELISA experiments were performed with 5-8 mice per group, and analyzed as mean  $\pm$  SD.

### **NanoString platform**

For NanoString gene expression analysis, the gene panel nCounter PanCancer Progression was used (catalog #XT-CSO-PROG1–12), which contains probes for 740 test genes and 30 housekeeping genes. RNA was purified with Single Cell RNA Purification kit (Norgen, Canada) from FACS sorted CD45+ live cells and analyzed with the nCounter platform. Data was filtered and normalized using a generalized linear model (GLM) (R package, NanoStringDiff (v. 1.16.0))(Wang et al., 2016) - based on positive controls, housekeeping genes and estimated background. Differential gene expression analysis was performed (met-high vs. met-low) using either (i) a negative binomial model, akin to DESeq2 (Love et al., 2014) and (ii) AUC-ROC curves (R package, Seurat (v. 3.1.4))(Butler et al., 2018)- collectively revealing 7 significant DEGs (FDR p-value < 0.05, fold-change > 1.25, AUC = 1). An AUC value of 1 denotes the ability of a given gene to perfectly distinguish met-high from met-low.

### **Multi-omics data analysis for characterization of the crosstalk between tumor cells and BM**

To identify the axis responsible for the crosstalk between tumor cells and the BM compartment, differential expression of cytokine receptor genes in the scRNA-seq BM data was analyzed and integrated with the tumor cytokine array findings. First, following SingleR cell type annotation of individual cells, the Wilcoxon rank-sum test method using the Seurat R package was applied, to identify, per cell type, the genes differentially expressed in met-high versus met-low groups. The testing was limited to genes

showing, on average, at least 1.2-fold difference and those detected in at least 10% of cells in either of the groups. Multiple comparison adjustment was carried out using Benjamini–Hochberg correction. Next, cytokines in the array were paired to their respective receptors within the differentially expressed genes, based on the KEGG cytokine–cytokine receptor interaction pathway entry (Kanehisa et al., 2016). This resulted in the list of cytokine-receptor pairs, per cell type, ranked by their cytokine expression ratio between the groups, receptor fold-change and its adjusted p-value of differential expression.

### **Statistical analysis for in vitro and in vivo studies**

Data are expressed as mean  $\pm$  standard deviation (SD). For in vitro studies, to ensure adequate statistical power, all experiments were performed with two technical repeats and at least three biological repeats. In the in vivo studies, mice that demonstrated pathological symptoms not related to their condition or disease were excluded from the study and the analysis. Mice were randomized before tumor implantation. The analysis of the results was performed blindly. At least 5 mice per group were used in order to reach statistical power considering a Gaussian distribution. The statistical significance of differences was assessed by one-way ANOVA, followed by Turkey post hoc statistical test when comparing between more than two sets of data or by two-tailed student's t-test when comparing between two sets of data, using GraphPad Prism 5 software (La Jolla, CA). Significance was set at values of  $p < 0.05$ .

## **Results**

### **Metastatic tumors promote hematopoiesis and myeloid skewing**

The interplay between the BM niche and solid tumors has not been fully characterized. Here, we sought to delineate the communication occurring between these two entities with respect to the metastatic process. To this end, we used tumor cell line pairs comprising one line that rarely metastasizes (met-low) and another line that metastasizes with high frequency (met-high). Cell lines within each pair originated from the same parental cell line, allowing a biologically relevant comparison. Mice were either sub-dermally implanted in the flank with met-low B16-F1 or met-high B16-F10 melanoma cells, or implanted in the mammary fat pad with met-low 67NR or met-high 4T1 breast carcinoma cells. In both tumor models, met-low and met-high primary tumors grew at similar rates, whereas lung metastasis was significantly increased in the met-high groups (Fig. S1A-C), in agreement with previous studies (Ishiguro et al., 1996; Schmaus and Sleeman, 2015). At endpoint, HSCs in the BM compartment of naïve and tumor-bearing mice were analyzed by flow cytometry. HSCs were defined as Lin<sup>-</sup>, Sca1<sup>+</sup> and CD117<sup>+</sup>, representing LSK cells, as previously described (van de Rijn et al., 1989). The percentage of LSK in the BM

of mice implanted with met-high tumors was increased compared to the met-low or tumor-free groups in both models (Fig. 1A-B). Of note, in the breast carcinoma model, LSK differences did not reach statistical significance. In addition, their levels were substantially lower than those in the melanoma model, probably due to known technical difficulty of Sca1+ immunostaining in BALB/c mice (Spangrude and Brooks, 1993). Since tumor progression is associated with pronounced myelopoiesis (Wu et al., 2014), we quantified myeloid and lymphoid cells in the BM compartment of naïve and tumor-bearing mice. Tumor-bearing mice exhibited an increase in myeloid cells and a decrease in lymphoid-derived B and T cells, in comparison to the tumor-free control group in the BM. The increased ratio of myeloid to lymphoid derived cells was most pronounced in mice implanted with met-high tumors (Fig. 1C-D). In addition, mice implanted with met-high tumors exhibited the highest number of colony forming units (CFU) derived from HSCs in peripheral blood, further indicating increased hematopoiesis (Fig. 1E). Taken together, our findings suggest that tumors promote hematopoiesis, an effect which is partially augmented in the presence of highly metastatic tumors.

### **Metastatic tumors dictate myeloid skewing in HSCs**

We next asked whether tumor-induced myelopoiesis is due to myeloid-biased HSC skewing. To test this, LSK cells obtained from naïve GFP-expressing mice were mixed with either met-low or met-high melanoma tumor cells in Matrigel and implanted in recipient mice (Fig. 2A). Control recipient mice were implanted with Matrigel containing either LSK cells or tumor cells (met-low or met-high cells). After 10 days, tumor size and the differentiation of GFP+ cells in tumors, peripheral blood and bone marrow were assessed. Tumor size was significantly increased in mice injected with the mixture of HSCs and met-high tumor cells, an effect which was not statistically significant in the corresponding met-low tumor group (Fig. 2B). These results suggest that HSCs give rise to hematopoietic cell subsets that support tumor growth. No GFP+ cells were detected in peripheral blood or BM (data not shown). When comparing between met-high and met-low tumors, no significant differences were detected in the percentages of granulocytes, total macrophages and pro-inflammatory M1 macrophages. However, the level of tumor-supporting M2 macrophages was significantly increased by approximately 2-fold in met-high tumors (Fig. 2C-F). In the same experimental setting using Lin- cells instead of LSK cells, a similar trend was found in tumor growth and number of Lin- derived macrophages in mice bearing met-high tumors compared to met-low tumors. However, Lin- derived granulocytes exhibited increased numbers only in met-high tumors (Fig. S2A-D). Taken together, our results demonstrate that in met-high tumors, HSCs undergo myeloid-biased skewing, an effect known to promote tumor aggressiveness and metastasis.

To investigate the direct effect of tumor-derived factors on HSC differentiation, we performed a colony forming assay assessed by MethoCult. Naïve bone marrow cells obtained from tumor-free mice were cultured with MethoCult containing conditioned medium (CM) of melanoma tumor cell lines or CM obtained from tumors adjusted to culture (tumor conditioned medium; TCM). After 12 days in culture, colonies were counted. We did not detect any difference in the number of colonies formed in the presence of CM or TCM when comparing between the met-low and met-high groups. However, an increased number of colonies were detected in TCM when compared to CM (Fig. S2E). Interestingly, most of the colonies were predominantly CFU-granulocyte (CFU-G) or CFU-monocyte (CFU-M) (Fig. S2F), suggesting that the tumor microenvironment leads to generalized myeloid-biased differentiation.

Next, LSK or Lin<sup>-</sup> cells obtained from BM of GFP-expressing mice harboring either met-low or met-high melanoma tumors were transplanted along with whole BM supporting cells into lethally irradiated naive recipient mice (Fig. 2G and Fig. 2SG, respectively). After 16 weeks, the percentages of circulating GFP<sup>+</sup> myeloid and lymphoid cells in the peripheral blood was evaluated. A significant increase in the percentage of myeloid but not lymphoid cells was found in mice transplanted with BM cells originating from met-high donors (Fig. 2H-I and Fig. S2H-I). Moreover, in the met-high group, the pro-inflammatory Ly6C<sup>high</sup> monocyte fraction was significantly increased in tested GFP<sup>+</sup> myeloid cells in peripheral blood, while there was a decrease in Ly6C<sup>low</sup> monocytes that exhibit a low inflammatory profile (Fig. 2J-K). No difference was observed in the granulocyte population (Fig. 2L). These results indicate that met-high tumors directly contribute to HSC fate by inducing myeloid-biased HSC differentiation, particularly to M2 macrophages in tumors and pro-inflammatory monocytes in peripheral blood.

### **Metastatic tumors affect myeloid progenitor composition**

To further substantiate our hypothesis of HSC programming by highly metastatic cells, we performed scRNA-seq of LSK cells obtained from the BM of mice implanted with met-low or met-high tumors. Twelve distinct clusters were found based on gene expression similarity when assessing met-high and met-low groups together (Fig. S3A). We next identified the specific cellular composition of the LSK cells by correlating single-cell expression profiles with ImmGen sorted cell reference transcriptomic database (Fig. 3A) (Aran et al., 2019; Heng et al., 2008). Specifically, we successfully identified myeloid progenitor cells including monocyte-dendritic and granulocyte-monocyte progenitor cells whose annotation were found to be significant (Fig. S3B, mean  $P = 0.0152$  and  $0.0079$ , respectively). Other annotated cell types were not significantly enriched e.g., B, T and NK cells (Fig. S3B). Importantly, among the LSK differentiation pattern enriched cells, monocyte-dendritic progenitors (MDPs) were highly enriched in met-high tumors whereas

granulocyte monocyte progenitor (GMPs) were highly enriched in met-low tumors ( $P < 0.0001$ , for both MDP and GMP, BCa bootstrap independent two-samples test for proportion differences) (Fig 3B-D). Furthermore, scRNA-seq data revealed that CX3CR1 is enriched within the MDP cells of the met-high tumor group (Fig. S3C-D,  $P = 0.041$ , Wilcoxon rank-sum test), in line with a previous study demonstrating that MDPs are initially identified as CX3CR1<sup>+</sup> cells (Yanez et al., 2017). To validate these findings, we implanted mice with met-low or met-high melanoma and breast tumors and analyzed the relative abundance of myeloid progenitor cells in the tumor. A significant elevation in the percentage of MDPs was observed in met-high melanoma and breast tumors compared to met-low tumors, while all other annotated cells including GMPs were not significantly changed (Fig. 3E and Fig. S3E-J). Moreover, genes differentially expressed in naïve and met-low MDPs (vs. met-high MDPs) significantly overlap (N=62, Fig S3K). They are involved in similar immune-related pathways (Fig S3L) and are potentially controlled by identical transcription factors (Fig S3M). Notably, the serum response factor (SRF) network - known to be involved in myeloid-dendritic differentiation (Guenther et al., 2019) - is enriched in naïve and met-low MDPs. Loss of SRF results in accumulation of undifferentiated HSCs (Ragu et al., 2010) - consistent with increased LSK levels within the bone marrow of met-high tumor bearing mice. In contrast, met-high MDPs are enriched for E2F-target genes involved in mitosis and the G2M checkpoint, suggesting they possess higher proliferative potential. Overall, these results suggest that met-low MDPs remain “naïve-like”, and that met-high tumors, specifically, educate hematopoietic stem cells by enriching the MDP population and altering its differentiation program.

### **IL-6 is a key player in the crosstalk between HSCs and tumor cells**

We next hypothesized that tumor-induced differentiation of HSCs to MDPs leads to tumor-promoting effects in the stroma. To investigate this, high throughput mass cytometry (CyTOF) was performed to analyze the percentage of different myeloid-derived cells in the stroma of met-high or met-low tumors followed by flow cytometry validation of specific cell types for both melanoma and breast carcinoma. Overall, the analysis of both CyTOF and flow cytometry data revealed a significant enrichment in M2 macrophages in met-high tumors compared to met-low tumors, whereas the levels of pro-inflammatory M1 macrophages were significantly decreased. In addition, the levels of Ly6C<sup>high</sup> monocytes were increased in met-high tumors in comparison to met-low tumors. Moreover, the granulocyte population was also significantly increased in met-high tumors in the melanoma but not breast carcinoma model (Fig. 4A, Fig. S4A-B). Overall, these results demonstrate similar trends to those we described in the LSK bone marrow transplantation experiment.

Next, we hypothesized that the crosstalk between tumor and bone marrow cells requires messenger proteins, e.g., cytokines. With the focus on MDPs, we searched for differentially expressed genes (DEGs) in MDPs between met-high and met-low groups. Overall, 207 genes were significantly altered between the two groups as shown in the volcano plot, including receptors and transmembrane proteins, such as IL-6Ra and IL-2R (Fig. S4C and Table S3). We next sought to identify tumor-secreted factors that correlate with the sc-RNA-seq data. A cytokine array to quantify the levels of a broad range of factors in the TCM of met-high and met-low melanomas was used. Several factors, including CXCL1, CXCL10, IL-3, IL-6 and IL-13, were found at higher levels in the TCM of met-high tumors (Fig. S4D). We then matched the cytokines to their corresponding receptors mentioned above. Using this approach, IL-6 and its receptor were found to be good candidates for mediating the crosstalk between tumor and BM cells (Fig. 4B). Verification by ELISA revealed that IL-6 was significantly upregulated in met-high TCM in both melanoma and breast carcinoma models (Fig. 4C). The IL-6 receptor (IL-6Ra) was found to be upregulated in MDPs of mice harboring met-high melanoma (Fig. 4D; average fold change = 1.21,  $P = 0.02$ , Wilcoxon rank-sum test), and its expression is abundant in the MDP population shown in the tSNE plot (Fig. 4E). These results were verified by flow cytometry for both melanoma and breast carcinoma (Fig. S4E). Transcription signatures of CD45+ stroma cells obtained from tumor microenvironment, assessed by NanoString approach, revealed 7 upregulated genes, including THBS1, MAPKAPK2, CD9, TXNIP, CD24, ITGA5 and SYK (Fig. S4F). Importantly, some of these genes (THBS1, MAPKAPK2, CD9, TXNIP) were strongly associated with IL-6 signaling (Lim et al., 2020; Lopez-Dee et al., 2011; Shi et al., 2017), indicating that IL-6 or its associated genes are associated with metastatic tumors, in alignment with our previous findings. Overall, these findings may explain the increased myeloid bias in met-high compared to met-low tumors.

To directly assess the effect of IL-6 on MDP proliferation and differentiation, MDP cells isolated from BM of naïve mice were seeded in Methocult medium supplemented with met-high or met-low TCM in the presence or absence of neutralizing IL-6 antibody. Following 12 days of incubation, myeloid colonies were scored. MDP cells formed more monocyte colonies in the presence of met-high TCM in comparison to the met-low group. Importantly, neutralizing IL-6 in the met-high group completely abolished MDP growth and colony formation (Fig. 4F).

One of the downstream effects in the IL-6 pathway is phosphorylation of STAT3 (Heinrich et al., 2003). To verify that MDPs respond directly to IL-6, we stimulated BM cells obtained from naïve mice with escalating doses of IL-6 for 30 minutes and evaluated p-STAT3 expression specifically in the activated MDP population. Indeed, p-STAT3 levels in MDP cells were increased upon stimulation with IL-6 in escalating doses (Fig. 4G), demonstrating that IL-6 directly affects MDPs expressing the IL-6 receptor (Fig. 4H). Taken

together, our results suggest that IL-6 secreted by highly metastatic tumors directly promotes myeloid biased HSC differentiation to MDPs.

### **IL-6 promotes metastasis via MDP-derived macrophages**

We next sought to investigate the effect of IL-6 signaling in vivo focusing on primary tumor growth, metastasis and HSC differentiation. To this end, mice were implanted with met-low or met-high melanoma or breast carcinoma cells, and subsequently either treated with IgG control or anti-IL-6 antibodies. The rates of primary tumor growth were similar in all groups throughout the course of the experiment (Fig. S5A-B). However, in both tumor models, anti-IL-6 treatment dramatically reduced the incidence of lung metastasis in mice harboring met-high tumors (Fig. 5A-D). This effect was accompanied by a significant decrease in MDP levels in the BM of these mice (Fig. 5E-F), suggesting a correlation between MDP levels and IL-6-mediated metastasis.

We next directly tested the effect of MDPs on metastasis in vivo by performing an MDP adoptive transfer experiment. GFP-expressing donor mice were implanted with met-high melanoma cells and then treated with control IgG or anti-IL-6 antibodies. GFP<sup>+</sup> MDPs from these mice were then adoptively transferred into recipient mice subsequently injected with met-low tumor cells, as schematically illustrated in Fig. 6A. No significant difference in tumor growth was observed between the two groups (Fig. 6B). The number of metastatic lesions in the lungs of mice adoptively transferred with anti-IL-6-treated MDPs was significantly reduced in comparison to IgG-treated MDP control group (Fig. 6C-D). However, when GMP cells that can differentiate to monocytes (Yanez et al., 2017), were adoptively transferred to mice bearing met-low tumors, as illustrated in Fig. S5C, no significant difference in lung metastasis were observed (Fig. S5D-E), suggesting that MDPs but not GMPs contribute to metastasis. Since MDP cells give rise to monocytes and dendritic cells (Morales et al., 1995), we next evaluated these two populations in lung single cell suspensions. Dendritic cells were barely detected in the GFP<sup>+</sup> MDP cell populations (Fig 6E). There were no differences in the levels of GFP<sup>+</sup> total macrophages and M1 macrophages between the two groups (Fig. 6F-G). However, the percentage of M2 GFP<sup>+</sup> macrophages was significantly decreased in the lungs of mice receiving anti-IL-6-treated MDPs, indicating that IL-6 blockade induces a functional change in MDPs (Fig. 6H). We should note that naïve GMP population, cultured in Methocult, supplemented with met-low or met-high TCM in the presence or absence of anti-IL-6, revealed low growth of colonies (Fig. S5F). Overall, these findings suggest that MDPs rather than GMPs, upon IL-6 secretion from highly metastatic tumors, differentiate into M2 macrophages at the metastatic sites and promote metastasis.

### **IL-6 is a driver protein of the metastatic switch**

To demonstrate that IL-6 is responsible for a metastatic switch in our experimental settings, we generated met-low melanoma tumors overexpressing IL-6 or EV control (B16-F1-IL-6 and B16-F1-EV, respectively). IL-6 expression in cultured cells was verified by ELISA (Fig. S6A), and the two cell lines exhibited similar proliferation rates (Fig. S6B). Next, mice were implanted with B16-F1-IL-6 or B16-F1-EV and tumor growth was assessed. There was no significant difference in tumor growth between the two groups (Fig. S6C), while a significant increase in IL-6 was found in TCM (Fig. S6D), suggesting that IL-6 has no direct pro-tumorigenic role in the primary tumor microenvironment. However, the incidence of lung metastasis was significantly increased in B16-F1-IL-6 tumor bearing mice (Fig. 6I-J). Moreover, the elevation in lung metastasis was directly associated with increased MDP levels detected in the bone marrow (Fig. 6K), while the levels of GMPs, CMPs, and MEPs remained unchanged between the two groups (Fig. S6E-G).

To further correlate between MDP and macrophages supporting metastasis in human samples, we analyzed RNA-seq from breast carcinoma patients using the METABRIC dataset (Curtis et al., 2012). A moderate, positive correlation ( $r \sim 0.4-0.5$ ) was found between IL-6 expression and the molecular signature of M2 macrophages (CD163, CD204, CD206, CD200R1, TGM2, IL1R2), whereas little correlation was found with an M1 gene signature (CD64, MHCII, CD86, CD80, CD68, NOS2) (Fig. 6L). This trend is strengthened when considering a single marker gene largely unique to each macrophage subtype (Fig. 6M), suggesting that a similar mechanism may exist in humans. Overall, these findings suggest that IL-6 directly affects MDPs, which in turn, differentiate into metastasis-promoting cells, an effect which may also present in humans.

### **Discussion**

Accumulating evidence suggests that tumors affect hematopoiesis (Wildes et al., 2019). The BM compartment is highly responsive to various conditions, including infection, inflammation and cancer (Hoggatt et al., 2016; Wilson et al., 2008). In the context of solid tumors, multiple reports have demonstrated the immunosuppressive function of HSCs (Casbon et al., 2015; Giles et al., 2016). Our study demonstrates that highly metastatic tumors communicate with the BM niche, specifically programming the differentiation of HSCs towards accessory immune cells that support metastasis. Furthermore, we demonstrate that the IL-6 pathway regulates tumor-induced HSC differentiation by promoting myeloid-biased skewing. This enriches the MDP population, ultimately giving rise to M2 macrophages at distant metastatic sites. Evidently, IL-6 overexpression in tumor cells with low metastatic potential resulted in



higher incidence of metastasis in the lungs and increased MDP cells, suggesting that IL-6 signaling serves as a metastatic switch in cancer.

In addition to the native function of the hematopoietic system in replenishing the blood cell compartment, it also functions in the immune response in various pathological conditions. Tumor progression is linked to pronounced perturbations in myelopoiesis, resulting in increased levels of committed and early myeloid progenitor populations (Wu et al., 2014). During tumor-induced myelopoiesis, HSCs migrate from the BM and accumulate at distant sites. There, they differentiate into tumor-supporting myeloid cells to drive immunosurveillance (Gabrilovich et al., 2012), participate in the formation of the pre-metastatic niche (Giles et al., 2016; Kaplan et al., 2005), and facilitate tumor cell seeding (Kaplan et al., 2005). A recent study has demonstrated that early progenitors can be found in the blood circulation of patients with different types of solid tumors, with higher levels of GMPs that eventually differentiate into granulocytes. Moreover, increased levels of myeloid progenitors correlated with overall poor outcome in these patients, driven in part by GM-CSF and IL-6 (Wu et al., 2014). In agreement, we observed myeloid bias in peripheral blood associated with highly metastatic tumors, as demonstrated by BM transplantation experiments using Lin<sup>-</sup> and LSK cells obtained from met-low or met-high tumor bearing mice. Specifically, scRNA-sequencing of LSK cells obtained from mice harboring met-high tumors revealed a gene signature that reflects an MDP differentiation pattern. These cells were then found to serve as the origin of tumor-associated macrophages in the pulmonary metastatic sites. These findings strongly support the concept that met-high tumors affect the HSC progeny at a very early hierarchical stage. Importantly, these effects were absent in met-low tumors which resulted in gene signature that is close to naïve HSCs. Moreover, the bone marrow transplantation experiment using educated LSK cells from tumor bearing mice further suggests that HSC fate is long-lived as they maintain their altered progeny in bone marrow of reconstituted mice. In fact, sustained met-high educated HSC specific differentiation suggests the involvement of epigenetic modifications that might regulate their programming, a process that should be further elucidated. Furthermore, while there is an overwhelming amount of evidence for HSCs giving rise to MDSCs in tumor conditions (Wildes et al., 2019), we found that LSK cells educated by met-low or met-high tumor conditions exhibit an MDSC phenotype, with specific differentiation program which further gives rise to M2 macrophages only in met-high tumors. Indeed, studies have demonstrated that myeloid cells and tumor-associated immunosuppressive macrophages (M2 macrophages) home to the pre-metastatic sites where they contribute to the recruitment and retention of circulating tumor cells (Condamine et al., 2015; Doak et al., 2018; Giles et al., 2016). In agreement with these studies, here we provide further evidence for the origin of M2 macrophages, since we demonstrate that highly metastatic

tumors promote metastasis through enrichment of MDP-derived macrophages localized at the metastatic sites. The existence of two distinct and independently regulated cellular pathways challenge the function of GMP-derived vs. MDP-derived monocytes and their relative contribution to metastasis. Here we suggest that MDPs but not GFPs have a novel function in metastasis progression.

HSCs express receptors of various inflammatory cytokines, such as IL-1, IL-6, interferon  $\lambda$  and TLR ligands, making them sensitive to external stimuli (King and Goodell, 2011; Nagai et al., 2006; Rieger et al., 2009). It has been suggested that such receptors regulate HSC differentiation. Thus, tumors may use this opportunity to condition the BM compartment via factors secreted by stromal and tumor cells. Our experimental model revealed an association between upregulated IL-6 levels in met-high TCM and elevated expression levels of IL-6Ra in met-high educated MDPs. The IL-6/IL-6R pathway is often hyperactivated in many types of cancer (Johnson et al., 2018) and plays a key role in proliferation, survival and invasiveness of tumor cells (Chang et al., 2013; Yu et al., 2009). In addition, it has been shown that IL-6 mediates metastatic mechanisms such as stimulation of epithelial-to-mesenchymal transition (Rokavec et al., 2014), and induction of matrix metalloproteinases (MMPs) (Yu and Jove, 2004). Our study further explains the contribution of IL-6 to metastasis, not by a direct effect on tumor cells or immune cells at the primary tumor microenvironment, but rather through programming HSCs towards tumor-supporting cells. Indeed, we demonstrated that IL-6 education of MDP cells alone enhances the metastatic potential of tumor cells. Indeed, a moderate correlation between IL-6 and gene signature of M2 but not M1 macrophages was found using human breast cancer samples from the METABRIC dataset. Thus, IL-6 should be further tested as a prognostic biomarker for metastasis in the context of immune cell composition in tumors and metastatic sites.

In the present study, anti-IL-6 treatment resulted in a dramatic drop in lung metastasis in met-high tumor bearing mice, while no effect was observed in the met-low group. Interestingly, anti-IL-6 treatment reduced the levels of MDPs in the BM along with M2 macrophages in the lungs of met-high tumor bearing mice, suggesting that MDP-derived macrophages serve as key promoters of metastasis formation. Anti-IL-6 monoclonal therapy was recently approved by the FDA for Castelman disease patients (Johnson et al., 2018). In the context of solid tumors, despite success in pre-clinical studies (Johnson et al., 2018), the efficacy of such treatment was limited in Phase I-II clinical trials among patients with prostate, ovarian and lung cancers (Angevin et al., 2014; Karkera et al., 2011). Indeed, we demonstrated that anti-IL-6 treatment does not inhibit primary tumor growth, whereas it dramatically reduces metastatic burden. In the clinic, anti-IL-6 studies were performed in patients with advanced metastatic disease. Our study therefore suggests that evaluating plasma levels of IL-6 and monitoring the rate of metastasis at early

stages, probably in the neoadjuvant setting, may provide better insights into the therapeutic potential of IL-6 inhibition.

Being at the apex of the hematopoietic hierarchy, HSCs represent an endless reservoir of cells with the potential to modulate tumor fate. Our study demonstrates a novel mechanism underlying direct tumor-mediated dictation of HSC differentiation and programming of its progeny in the tumor microenvironment. This, in turn, becomes an essential process for tumor progression and metastasis. We demonstrate that the crosstalk between the tumor and distant BM niche is mediated by IL-6/IL-6R signaling, paving the way towards new therapeutic approaches to target metastasis.

### **Author contribution**

Conception and design: KMK, KK, SSS and YS.

Acquisition of data: KMK, KK, TC, RN, MT, ZR, and BJ.

Analysis and interpretation of data: KMK, KK, TC, RN, TZ, RG, ZAR, SSS, and YS.

Writing, review, and/or revision of the manuscript: KMK, KK, RG, ZAR, SSS, and YS.

Study supervision: YS.

### **Acknowledgment**

This work is supported primarily by H2020 European Research Council Grant (711222) given to YS. TC is supported by TICC-Rubinstein fellowship. This study makes use of data generated by the Molecular Taxonomy Breast Cancer International Consortium. Funding for the project was provided by Cancer Research UK and the British Columbia Cancer Agency Branch. The authors declare no conflict of interest.

### **References**

- Amir el, A.D., Davis, K.L., Tadmor, M.D., Simonds, E.F., Levine, J.H., Bendall, S.C., Shenfeld, D.K., Krishnaswamy, S., Nolan, G.P., and Pe'er, D. (2013). viSNE enables visualization of high dimensional single-cell data and reveals phenotypic heterogeneity of leukemia. *Nat Biotechnol* *31*, 545-552.
- Angevin, E., Taberero, J., Elez, E., Cohen, S.J., Bahleda, R., van Laethem, J.L., Ottensmeier, C., Lopez-Martin, J.A., Clive, S., Joly, F., *et al.* (2014). A phase I/II, multiple-dose, dose-escalation study of siltuximab, an anti-interleukin-6 monoclonal antibody, in patients with advanced solid tumors. *Clinical cancer research : an official journal of the American Association for Cancer Research* *20*, 2192-2204.

- Aran, D., Looney, A.P., Liu, L., Wu, E., Fong, V., Hsu, A., Chak, S., Naikawadi, R.P., Wolters, P.J., Abate, A.R., *et al.* (2019). Reference-based analysis of lung single-cell sequencing reveals a transitional profibrotic macrophage. *Nat Immunol* *20*, 163-172.
- Butler, A., Hoffman, P., Smibert, P., Papalexi, E., and Satija, R. (2018). Integrating single-cell transcriptomic data across different conditions, technologies, and species. *Nat Biotechnol* *36*, 411-420.
- Casbon, A.J., Reynaud, D., Park, C., Khuc, E., Gan, D.D., Schepers, K., Passegue, E., and Werb, Z. (2015). Invasive breast cancer reprograms early myeloid differentiation in the bone marrow to generate immunosuppressive neutrophils. *Proc Natl Acad Sci U S A* *112*, E566-575.
- Chang, Q., Bournazou, E., Sansone, P., Berishaj, M., Gao, S.P., Daly, L., Wels, J., Theilen, T., Granitto, S., Zhang, X., *et al.* (2013). The IL-6/JAK/Stat3 feed-forward loop drives tumorigenesis and metastasis. *Neoplasia* *15*, 848-862.
- Chang, Y.H., Chu, T.Y., and Ding, D.C. (2020). Human fallopian tube epithelial cells exhibit stemness features, self-renewal capacity, and Wnt-related organoid formation. *J Biomed Sci* *27*, 32.
- Condamine, T., Ramachandran, I., Youn, J.I., and Gabrilovich, D.I. (2015). Regulation of tumor metastasis by myeloid-derived suppressor cells. *Annu Rev Med* *66*, 97-110.
- Curtis, C., Shah, S.P., Chin, S.F., Turashvili, G., Rueda, O.M., Dunning, M.J., Speed, D., Lynch, A.G., Samarajiwa, S., Yuan, Y., *et al.* (2012). The genomic and transcriptomic architecture of 2,000 breast tumours reveals novel subgroups. *Nature* *486*, 346-352.
- Doak, G.R., Schwertfeger, K.L., and Wood, D.K. (2018). Distant Relations: Macrophage Functions in the Metastatic Niche. *Trends Cancer* *4*, 445-459.
- Finak, G., McDavid, A., Yajima, M., Deng, J., Gersuk, V., Shalek, A.K., Slichter, C.K., Miller, H.W., McElrath, M.J., Prlic, M., *et al.* (2015). MAST: a flexible statistical framework for assessing transcriptional changes and characterizing heterogeneity in single-cell RNA sequencing data. *Genome Biol* *16*, 278.
- Gabrilovich, D.I. (2017). Myeloid-Derived Suppressor Cells. *Cancer immunology research* *5*, 3-8.
- Gabrilovich, D.I., Ostrand-Rosenberg, S., and Bronte, V. (2012). Coordinated regulation of myeloid cells by tumours. *Nat Rev Immunol* *12*, 253-268.
- Giles, A.J., Reid, C.M., Evans, J.D., Murgai, M., Vicioso, Y., Highfill, S.L., Kasai, M., Vahdat, L., Mackall, C.L., Lyden, D., *et al.* (2016). Activation of Hematopoietic Stem/Progenitor Cells Promotes Immunosuppression Within the Pre-metastatic Niche. *Cancer Res* *76*, 1335-1347.
- Guenther, C., Faisal, I., Uotila, L.M., Asens, M.L., Harjunpaa, H., Savinko, T., Ohman, T., Yao, S., Moser, M., Morris, S.W., *et al.* (2019). A beta2-Integrin/MRTF-A/SRF Pathway Regulates Dendritic Cell Gene Expression, Adhesion, and Traction Force Generation. *Front Immunol* *10*, 1138.
- Heinrich, P.C., Behrmann, I., Haan, S., Hermanns, H.M., Muller-Newen, G., and Schaper, F. (2003). Principles of interleukin (IL)-6-type cytokine signalling and its regulation. *Biochem J* *374*, 1-20.
- Heng, T.S., Painter, M.W., and Immunological Genome Project, C. (2008). The Immunological Genome Project: networks of gene expression in immune cells. *Nat Immunol* *9*, 1091-1094.
- Hoggatt, J., Kfoury, Y., and Scadden, D.T. (2016). Hematopoietic Stem Cell Niche in Health and Disease. *Annu Rev Pathol* *11*, 555-581.
- Ishiguro, T., Nakajima, M., Naito, M., Muto, T., and Tsuruo, T. (1996). Identification of genes differentially expressed in B16 murine melanoma sublines with different metastatic potentials. *Cancer Res* *56*, 875-879.

- Johnson, D.E., O'Keefe, R.A., and Grandis, J.R. (2018). Targeting the IL-6/JAK/STAT3 signalling axis in cancer. *Nat Rev Clin Oncol* *15*, 234-248.
- Kanehisa, M., Sato, Y., Kawashima, M., Furumichi, M., and Tanabe, M. (2016). KEGG as a reference resource for gene and protein annotation. *Nucleic Acids Res* *44*, D457-462.
- Kaplan, R.N., Riba, R.D., Zacharoulis, S., Bramley, A.H., Vincent, L., Costa, C., MacDonald, D.D., Jin, D.K., Shido, K., Kerns, S.A., *et al.* (2005). VEGFR1-positive haematopoietic bone marrow progenitors initiate the pre-metastatic niche. *Nature* *438*, 820-827.
- Karkera, J., Steiner, H., Li, W., Skradski, V., Moser, P.L., Riethdorf, S., Reddy, M., Puchalski, T., Safer, K., Prabhakar, U., *et al.* (2011). The anti-interleukin-6 antibody siltuximab down-regulates genes implicated in tumorigenesis in prostate cancer patients from a phase I study. *Prostate* *71*, 1455-1465.
- King, K.Y., and Goodell, M.A. (2011). Inflammatory modulation of HSCs: viewing the HSC as a foundation for the immune response. *Nat Rev Immunol* *11*, 685-692.
- Liberzon, A., Birger, C., Thorvaldsdottir, H., Ghandi, M., Mesirov, J.P., and Tamayo, P. (2015). The Molecular Signatures Database (MSigDB) hallmark gene set collection. *Cell Syst* *1*, 417-425.
- Lim, J.O., Shin, N.R., Seo, Y.S., Nam, H.H., Ko, J.W., Jung, T.Y., Lee, S.J., Kim, H.J., Cho, Y.K., Kim, J.C., *et al.* (2020). Silibinin Attenuates Silica Dioxide Nanoparticles-Induced Inflammation by Suppressing TXNIP/MAPKs/AP-1 Signaling. *Cells* *9*.
- Lopez-Dee, Z., Pidcock, K., and Gutierrez, L.S. (2011). Thrombospondin-1: multiple paths to inflammation. *Mediators Inflamm* *2011*, 296069.
- Love, M.I., Huber, W., and Anders, S. (2014). Moderated estimation of fold change and dispersion for RNA-seq data with DESeq2. *Genome Biol* *15*, 550.
- Mehlen, P., and Puisieux, A. (2006). Metastasis: a question of life or death. *Nature reviews Cancer* *6*, 449-458.
- Morales, D.E., McGowan, K.A., Grant, D.S., Maheshwari, S., Bhartiya, D., Cid, M.C., Kleinman, H.K., and Schnaper, H.W. (1995). Estrogen promotes angiogenic activity in human umbilical vein endothelial cells in vitro and in a murine model. *Circulation* *91*, 755-763.
- Nagai, Y., Garrett, K.P., Ohta, S., Bahrn, U., Kouro, T., Akira, S., Takatsu, K., and Kincade, P.W. (2006). Toll-like receptors on hematopoietic progenitor cells stimulate innate immune system replenishment. *Immunity* *24*, 801-812.
- Ragu, C., Elain, G., Mylonas, E., Ottolenghi, C., Cagnard, N., Daegelen, D., Passegue, E., Vainchenker, W., Bernard, O.A., and Penard-Lacronique, V. (2010). The transcription factor Srf regulates hematopoietic stem cell adhesion. *Blood* *116*, 4464-4473.
- Rieger, M.A., Hoppe, P.S., Smejkal, B.M., Eitelhuber, A.C., and Schroeder, T. (2009). Hematopoietic cytokines can instruct lineage choice. *Science* *325*, 217-218.
- Rokavec, M., Oner, M.G., Li, H., Jackstadt, R., Jiang, L., Lodygin, D., Kaller, M., Horst, D., Ziegler, P.K., Schwitalla, S., *et al.* (2014). IL-6R/STAT3/miR-34a feedback loop promotes EMT-mediated colorectal cancer invasion and metastasis. *J Clin Invest* *124*, 1853-1867.
- Schmaus, A., and Sleeman, J.P. (2015). Hyaluronidase-1 expression promotes lung metastasis in syngeneic mouse tumor models without affecting accumulation of small hyaluronan oligosaccharides in tumor interstitial fluid. *Glycobiology* *25*, 258-268.

Shaked, Y., Pham, E., Hariharan, S., Magidey, K., Beyar-Katz, O., Xu, P., Man, S., Wu, F.T., Miller, V., Andrews, D., *et al.* (2016). Evidence Implicating Immunological Host Effects in the Efficacy of Metronomic Low-Dose Chemotherapy. *Cancer Res* **76**, 5983-5993.

Shi, Y., Zhou, W., Cheng, L., Chen, C., Huang, Z., Fang, X., Wu, Q., He, Z., Xu, S., Lathia, J.D., *et al.* (2017). Tetraspanin CD9 stabilizes gp130 by preventing its ubiquitin-dependent lysosomal degradation to promote STAT3 activation in glioma stem cells. *Cell Death Differ* **24**, 167-180.

Spangrude, G.J., and Brooks, D.M. (1993). Mouse strain variability in the expression of the hematopoietic stem cell antigen Ly-6A/E by bone marrow cells. *Blood* **82**, 3327-3332.

van de Rijn, M., Heimfeld, S., Spangrude, G.J., and Weissman, I.L. (1989). Mouse hematopoietic stem-cell antigen Sca-1 is a member of the Ly-6 antigen family. *Proc Natl Acad Sci U S A* **86**, 4634-4638.

Wang, H., Horbinski, C., Wu, H., Liu, Y., Sheng, S., Liu, J., Weiss, H., Stromberg, A.J., and Wang, C. (2016). NanoStringDiff: a novel statistical method for differential expression analysis based on NanoString nCounter data. *Nucleic Acids Res* **44**, e151.

Wang, Y., Ding, Y., Guo, N., and Wang, S. (2019). MDSCs: Key Criminals of Tumor Pre-metastatic Niche Formation. *Front Immunol* **10**, 172.

Wildes, T.J., Flores, C.T., and Mitchell, D.A. (2019). Concise Review: Modulating Cancer Immunity with Hematopoietic Stem and Progenitor Cells. *Stem cells* **37**, 166-175.

Wilson, A., Laurenti, E., Oser, G., van der Wath, R.C., Blanco-Bose, W., Jaworski, M., Offner, S., Dunant, C.F., Eshkind, L., Bockamp, E., *et al.* (2008). Hematopoietic stem cells reversibly switch from dormancy to self-renewal during homeostasis and repair. *Cell* **135**, 1118-1129.

Wu, W.C., Sun, H.W., Chen, H.T., Liang, J., Yu, X.J., Wu, C., Wang, Z., and Zheng, L. (2014). Circulating hematopoietic stem and progenitor cells are myeloid-biased in cancer patients. *Proc Natl Acad Sci U S A* **111**, 4221-4226.

Yanez, A., Coetzee, S.G., Olsson, A., Muench, D.E., Berman, B.P., Hazelett, D.J., Salomonis, N., Grimes, H.L., and Goodridge, H.S. (2017). Granulocyte-Monocyte Progenitors and Monocyte-Dendritic Cell Progenitors Independently Produce Functionally Distinct Monocytes. *Immunity* **47**, 890-902 e894.

Yu, G., Wang, L.G., Han, Y., and He, Q.Y. (2012). clusterProfiler: an R package for comparing biological themes among gene clusters. *OMICS* **16**, 284-287.

Yu, H., and Jove, R. (2004). The STATs of cancer--new molecular targets come of age. *Nature reviews Cancer* **4**, 97-105.

Yu, H., Pardoll, D., and Jove, R. (2009). STATs in cancer inflammation and immunity: a leading role for STAT3. *Nature reviews Cancer* **9**, 798-809.

## Figure Legends

**Figure 1: Metastatic tumors promote myeloid-biased skewing of hematopoietic stem cells.** Mice were either sub-dermally implanted in the flank with met-low B16-F1 or met-high B16-F10 melanoma cells ( $5 \times 10^5$  cell/mouse), or implanted in the mammary fat pad with met-low 67NR or met-high 4T1 breast carcinoma cells ( $5 \times 10^5$  cell/mouse). Control mice (naïve) were not implanted with tumor cells. At endpoint

(day 18 and day 21, respectively), mice were sacrificed, and bone marrow and blood were harvested. (A) LSK cells in the BM were analyzed by flow cytometry. The cells were previously gated to exclude doublets and lineage positive cells. Representative flow cytometry plots are shown. (B) Quantification of LSK cells from the lineage negative cells (n=5-8 mice/group). (C) Lymphoid T and B cells and myeloid CD11b<sup>+</sup> cells were quantified in the BM by flow cytometry. Representative plots are shown. Percentages are presented as means  $\pm$  standard deviation (n=5-8 mice/group). (D) Myeloid to lymphoid cell ratios in the bone marrow compartment are shown (n=5-8 mice/group). (E) Circulating hematopoietic stem and progenitor cells in peripheral blood (PB) were evaluated by a colony forming assay. CFU colony counts are shown (n=3-4 mice/group). Statistical significance was assessed by one-way ANOVA, followed by Tukey post-hoc test when comparing more than two groups or unpaired two-tailed t-test when comparing two groups. Asterisks represent significance from control, unless indicated otherwise in the figure. Significant p values are shown as \*, p<0.05, \*\* p<0.01, \*\*\*p<0.001.

**Figure 2: Metastatic tumors dictate HSC differentiation.** (A) A schematic representation of the LSK and tumor cell co-implantation experiment is shown. LSK cells obtained from naïve GFP-expressing donor mice were co-injected with either met-low or met-high melanoma tumor cells to recipient mice. Control recipient mice (not shown) were either injected with LSK cells alone, or with tumor cells alone. At endpoint, mice were sacrificed, and tumors harvested. GFP<sup>+</sup> progeny in tumors was assessed by flow cytometry (n=4-5 mice/group). (B) Tumor volumes at endpoint are presented. (C-F) The percentages of granulocytes (C), total macrophages (D), M1 (E) and M2 (F) macrophages in tumors were determined by flow cytometry on GFP<sup>+</sup> gated cells. (G) A schematic representation of the tumor-educated LSK transplantation experiment is shown. LSK cells were obtained from the bone marrow of donor mice harboring met-low or met-high melanomas. The LSK cells ( $5 \times 10^3$ ) were injected together with whole bone marrow supportive cells ( $1 \times 10^6$ ) from naïve mice into lethally-irradiated naïve recipient mice. Donor engraftment was monitored for 16 weeks post transplantation. GFP<sup>+</sup> progeny in peripheral blood was assessed by flow cytometry. (H-I) Lineage distribution of myeloid (H) and lymphoid-derived cells (I) are shown. (J-L) The percentage of GFP+Ly6C<sup>high</sup> monocytes (J), Ly6C<sup>low</sup> monocytes (K) and GFP+Ly6G<sup>+</sup> granulocytes (L) were gated from myeloid CD11b<sup>+</sup> cells (n=5 mice/group). Statistical significance was assessed by one-way ANOVA, followed by Tukey post-hoc test when comparing more than two groups or unpaired two-tailed t-test when comparing two groups. Asterisks represent significance from control, unless indicated otherwise in the figure. Significant p values are shown as \* p<0.05; \*\* p<0.01; \*\*\*p<0.001.

**Figure 3: Metastatic tumors affect myeloid progenitor composition.** Mice were implanted with met-high or met-low melanoma tumor cells. At endpoint, LSK cells were obtained from bone marrow and analyzed by single cell RNA sequencing. (A) t-SNE plots of LSK clustering and individual cell type annotation by SingleR for both groups, using ImmGen gene expression compendium as a reference. MDP and GMP clusters are indicated by blue and red arrows, respectively. (B) Stem and progenitor enrichment levels in met-low and met-high groups, calculated by BCa bootstrap independent two-samples test for proportion differences. (C-D) Mapping of MDP (C) and GMP (D) cells on t-SNE plots in met-low and met-high groups. Statistical significance was assessed by Wilcoxon rank-sum test. (E) Flow cytometry validation of MDP percentage from Lin<sup>-</sup> cells of met-low and met-high tumor bearing mice. Melanoma and breast carcinoma models are shown (n=5 mice/group in melanoma model, n=5-10 mice/group in breast carcinoma model). Statistical significance was assessed using unpaired two-tailed t-test and shown \* p<0.05; \*\*\*p<0.001.

**Figure 4: IL-6 mediates crosstalk between HSCs and tumor cells.** Mice were implanted with met-high or met-low melanoma. At endpoint, tumors were removed and prepared as single cell suspension for the evaluation of immune cells by CyTOF. (A) viSNE plot based on CD11b<sup>+</sup> myeloid cells of met-low and met-high melanoma tumors (3 samples per group were pooled). (B) Mapping upregulated cytokines in met-high tumor conditioned medium (TCM) with their corresponding receptors, differentially expressed by progenitor populations, as identified by single cell RNA sequencing (Wilcoxon rank-sum test followed by Benjamini–Hochberg correction). (C) IL-6 levels were quantified by ELISA in met-low and met-high TCM of melanoma and breast carcinoma models (n= 5-8=mice / group). (D) IL-6Ra expression in the MDP population in the bone marrow of met-low and met-high melanoma bearing mice, based on scRNA-seq dataset (average fold change = 1.21, P = 0.02, Wilcoxon rank-sum test). (E) Single cell IL-6Ra mRNA expression labeling on the t-SNE plot. (F) MDPs from naïve mice were grown in Methocult medium supplemented with met-low or met-high melanoma TCM in the presence or absence of anti-IL-6 neutralizing antibodies. MDP-derived colonies were counted (n=3 biological repeats / group). (G-H) MDPs obtained from the bone marrow of naïve mice were stimulated with escalating doses of IL-6. The levels of p-STAT3 (G) and IL-6Ra (H) were determined by flow cytometry. Statistical significance was assessed by one-way ANOVA, followed by Tukey post-hoc test when comparing more than two groups or unpaired two-tailed t-test when comparing two groups. Significant p values are shown as \* p<0.05; \*\* p<0.01.



**Figure 5: IL-6 pathway blockade in MDPs inhibits metastasis.** Mice were implanted with met-low or met-high melanoma or breast carcinoma cells. One week later, mice were treated with IgG (control) or anti-IL-6 antibodies twice weekly. At endpoint, mice were sacrificed, lungs were removed, and bone marrow was harvested (n=5-8 mice/group). (A-B) Representative images of lung sections are shown, bar=100 $\mu$ m. Arrows indicate metastatic foci. (C-D) Metastatic foci per lung section were quantified (n=5-7 sections/mouse). (E-F) MDP levels in BM of melanoma met-low and met-high melanoma (E) or breast carcinoma (F) were assessed by flow cytometry. Statistical significance was assessed by one-way ANOVA, followed by Tukey post-hoc test when comparing more than two groups. Significant p values are shown as \* p<0.05; \*\* p<0.005.

**Figure 6: IL-6 promotes metastasis via MDP-derived macrophages.** (A) A schematic representation of the experimental design is shown. GFP-expressing mice implanted with met-high melanoma cells were either treated with IgG control or anti-IL-6 antibodies twice weekly. At endpoint, FACS sorted MDPs were intravenously injected into naïve recipient mice (n=5 mice / group). The next day, the recipient mice were implanted with met-low melanoma cells. At endpoint, mice were sacrificed, and tumors and lungs were extracted. (B) Tumor weights are shown. (C) Representative images of lung sections are shown, bar=100 $\mu$ m. Arrows indicate metastatic foci. (D) Metastatic foci per lung section were quantified (n=5-7 sections per group). (E-H) GFP+ cells in single cell suspensions of lung samples were evaluated by flow cytometry to quantify the percentage of dendritic cells (E), total macrophages (F), M1 macrophages (G), and M2 macrophages (H). (I-K) Eight-to-ten week old C57Bl/6 mice were implanted with B16 IL-6 overexpressing cells or with corresponding control EV cells. At endpoint (day 18), mice were sacrificed, lungs were removed, and the bone marrow was harvested (n=4-6 mice/group). (I) Representative images of lung sections are shown, bar=100 $\mu$ m. Arrows indicate metastatic foci. (J) Metastatic foci per lung section were quantified (n=4-6 sections/mouse). (K) MDP levels in BM were assessed by flow cytometry. (L) Heat-map of linear correlations in r values between IL-6 expression and M1 or M2 gene signatures as well as single genes CD64 or CD163 representing M1 and M2 subsets, respectively. The data was obtained from human breast cancer samples using the METABRIC dataset. (M) Scatter graphs of IL-6 expression in correlation with CD64 or CD163 in human breast cancer samples (METABRIC dataset). Statistical significance was assessed by unpaired two-tailed t-test. Significant p values are shown as \* p<0.05; \*\* p<0.01.

**Fig.1**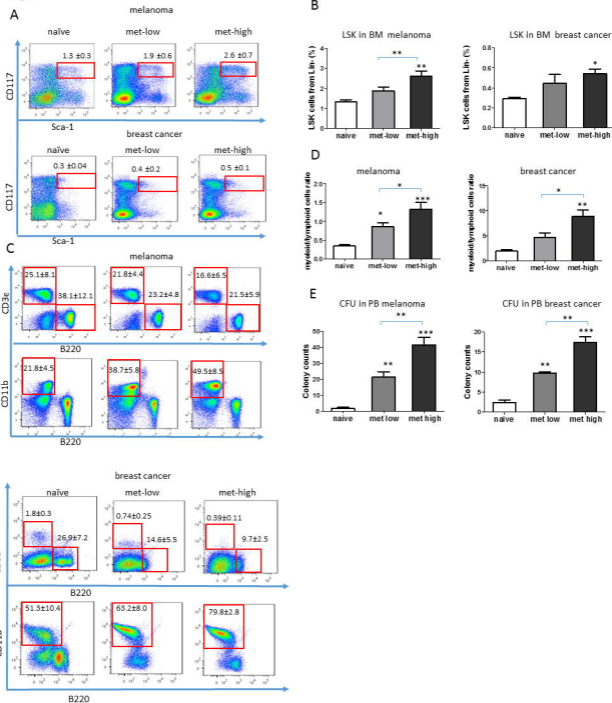

**Fig.2**

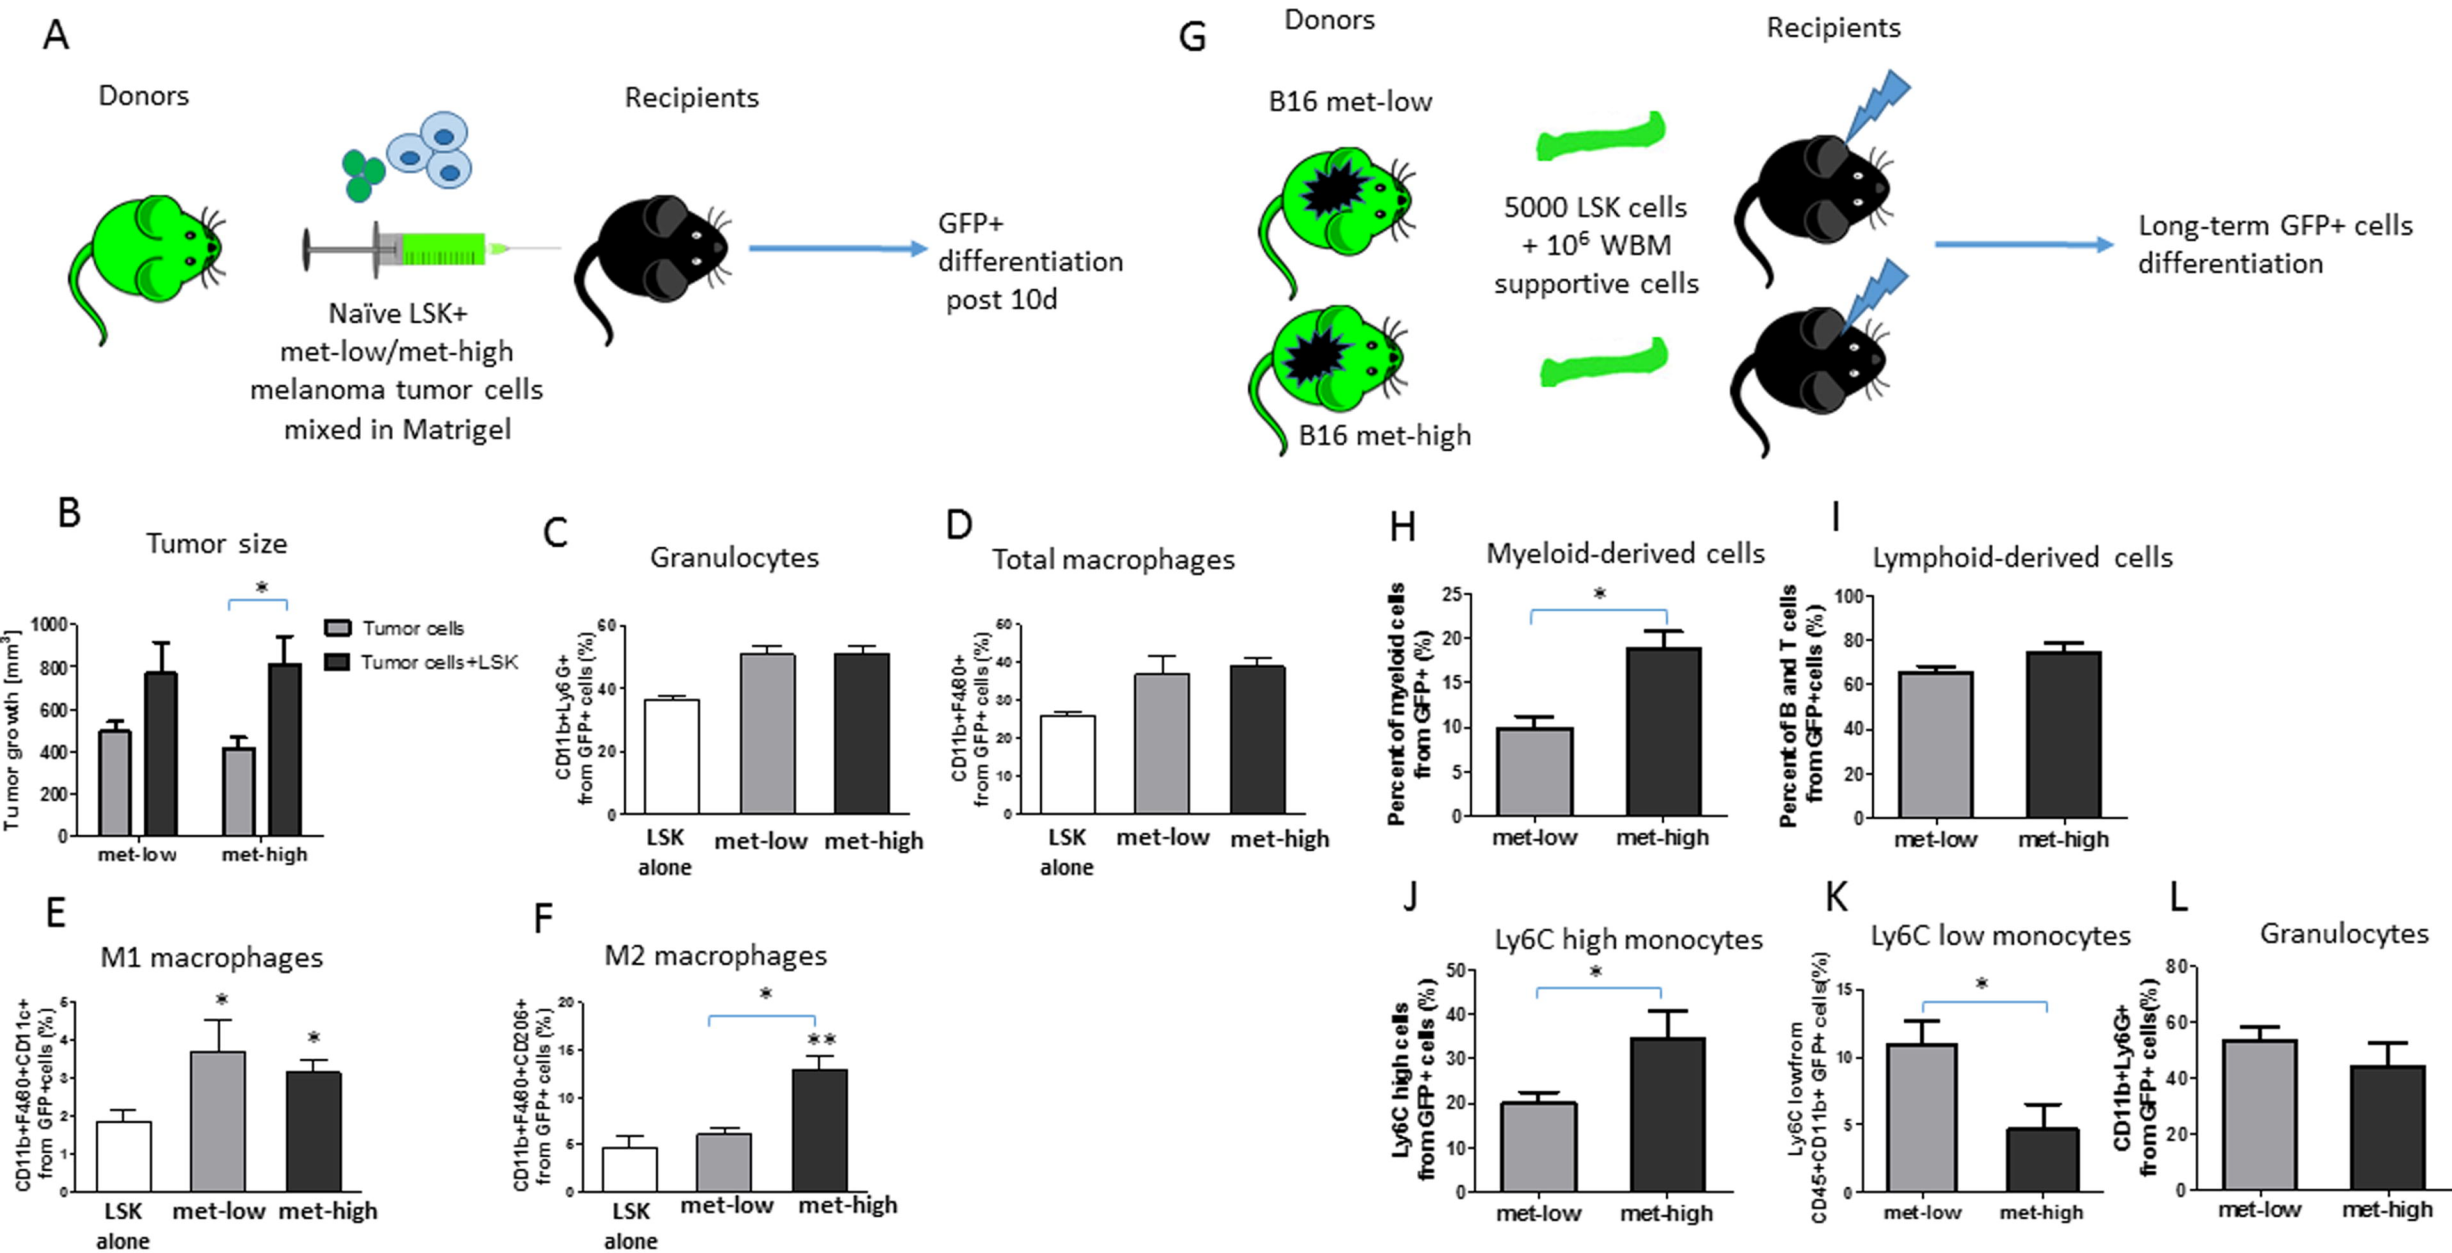

Fig.3

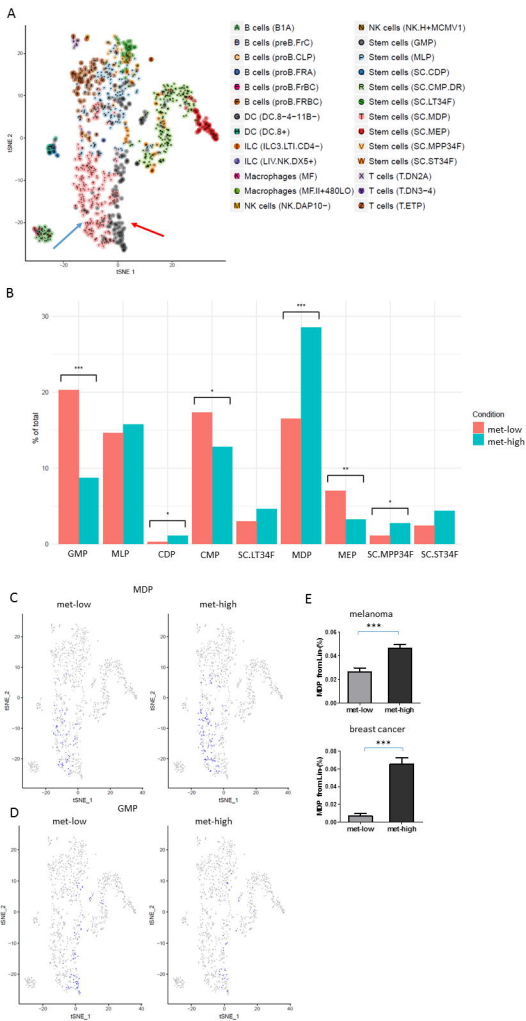

Fig.4

A

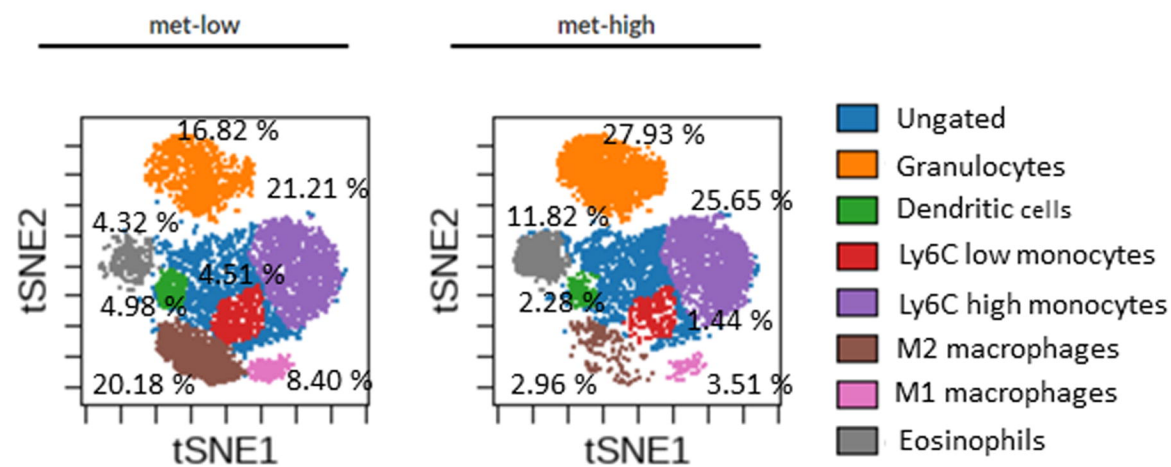

C

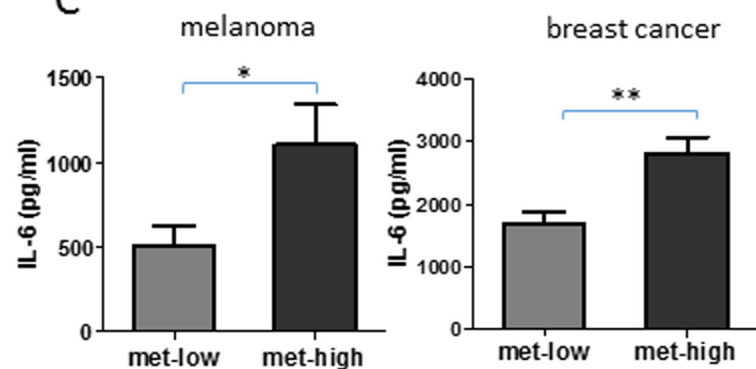

E

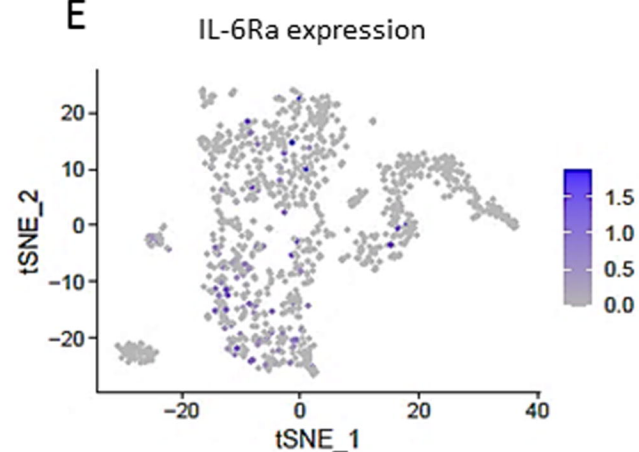

D

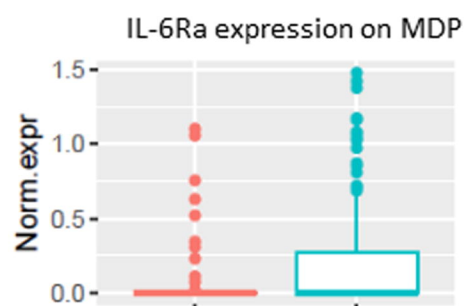

F

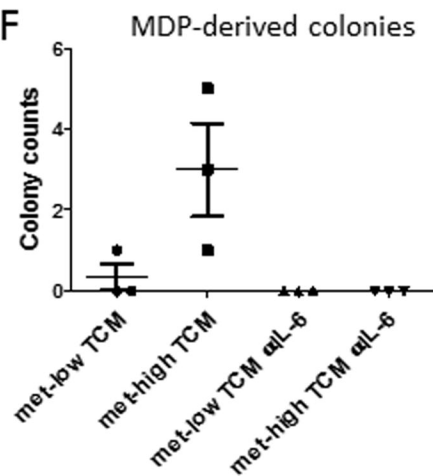

B

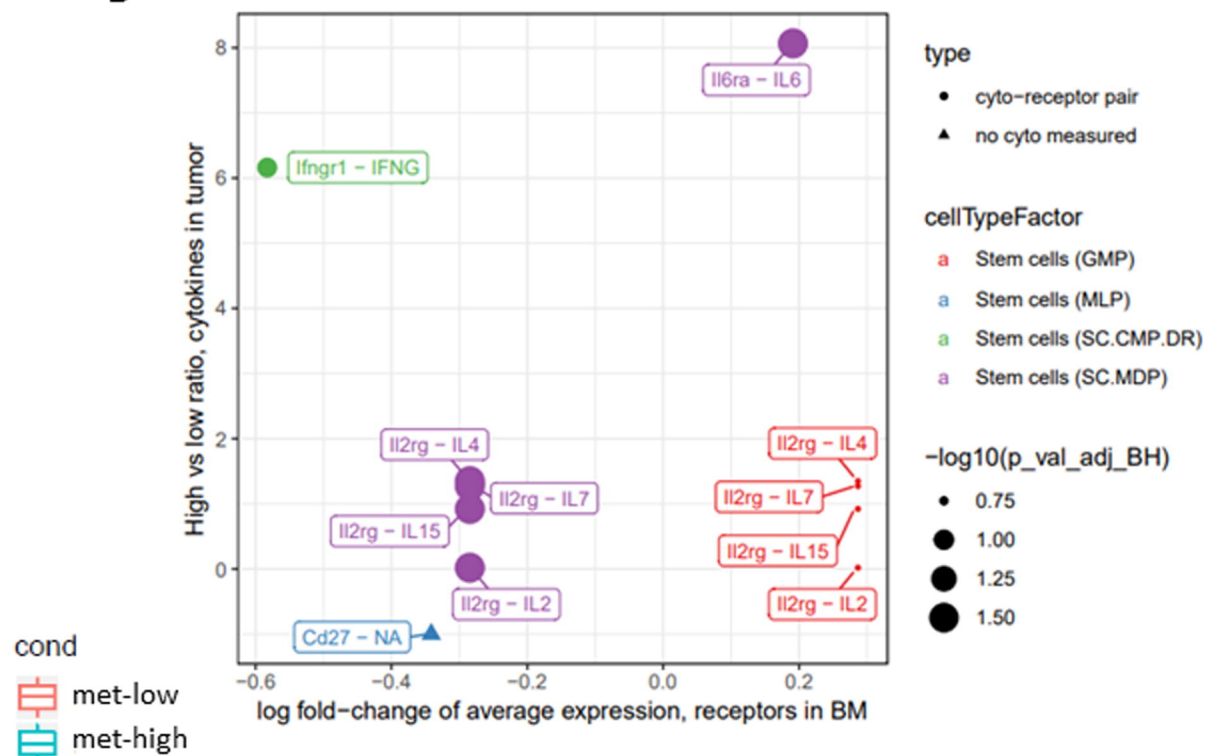

G

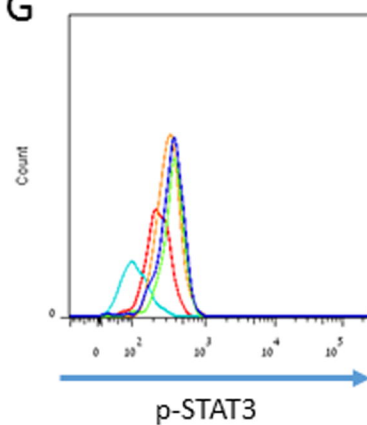

H

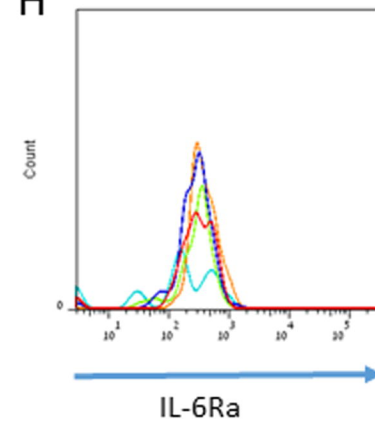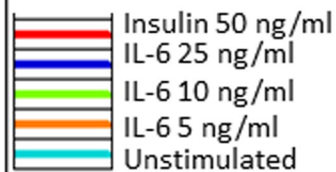

Fig.5

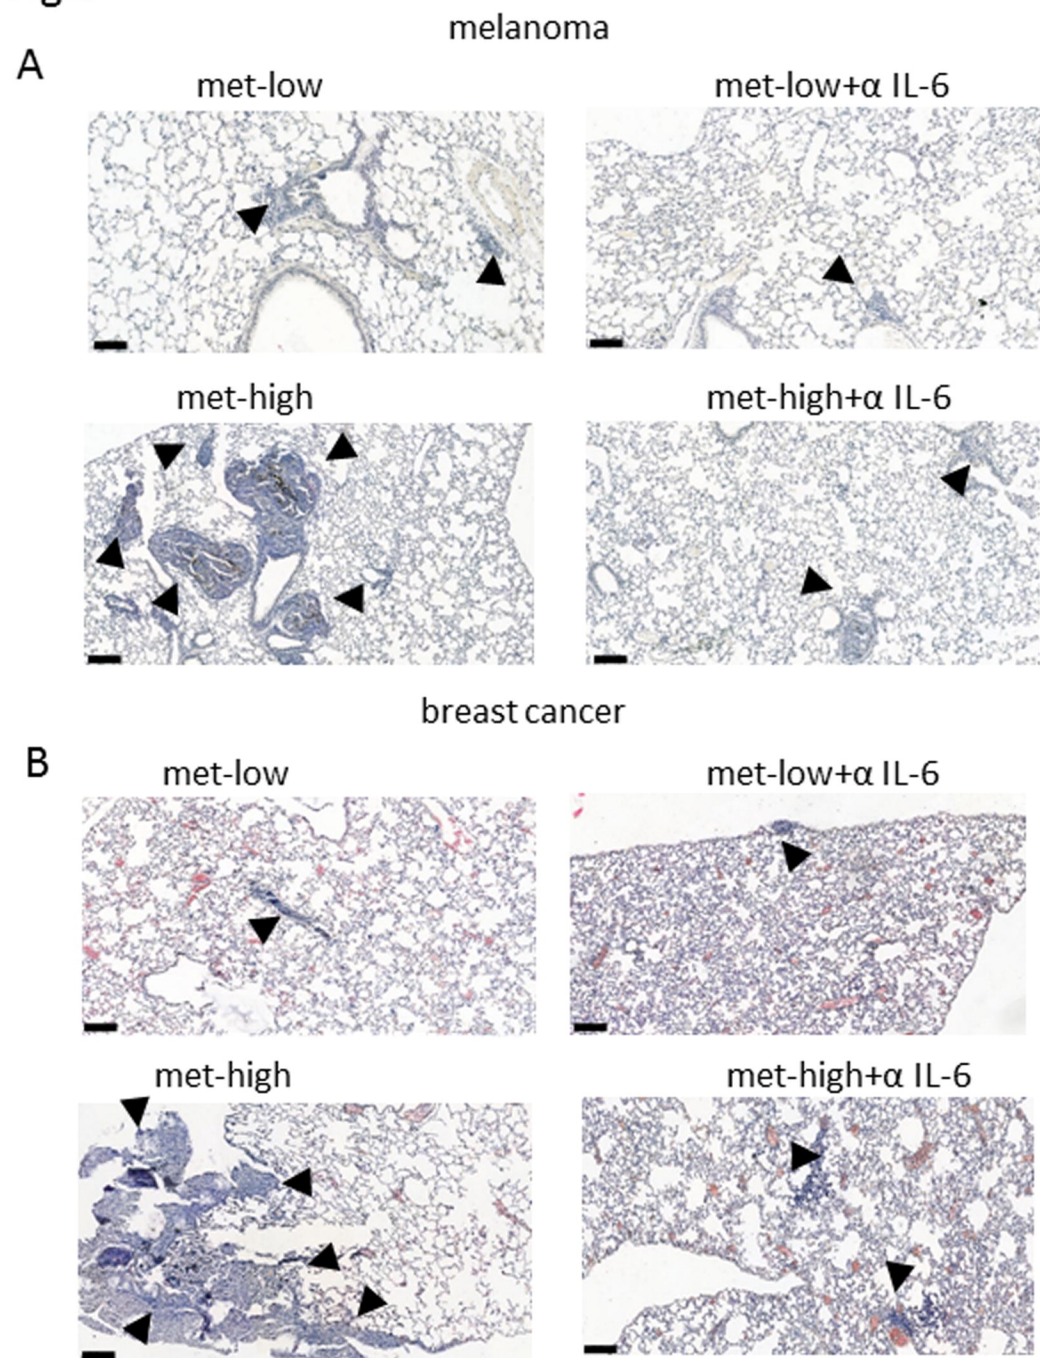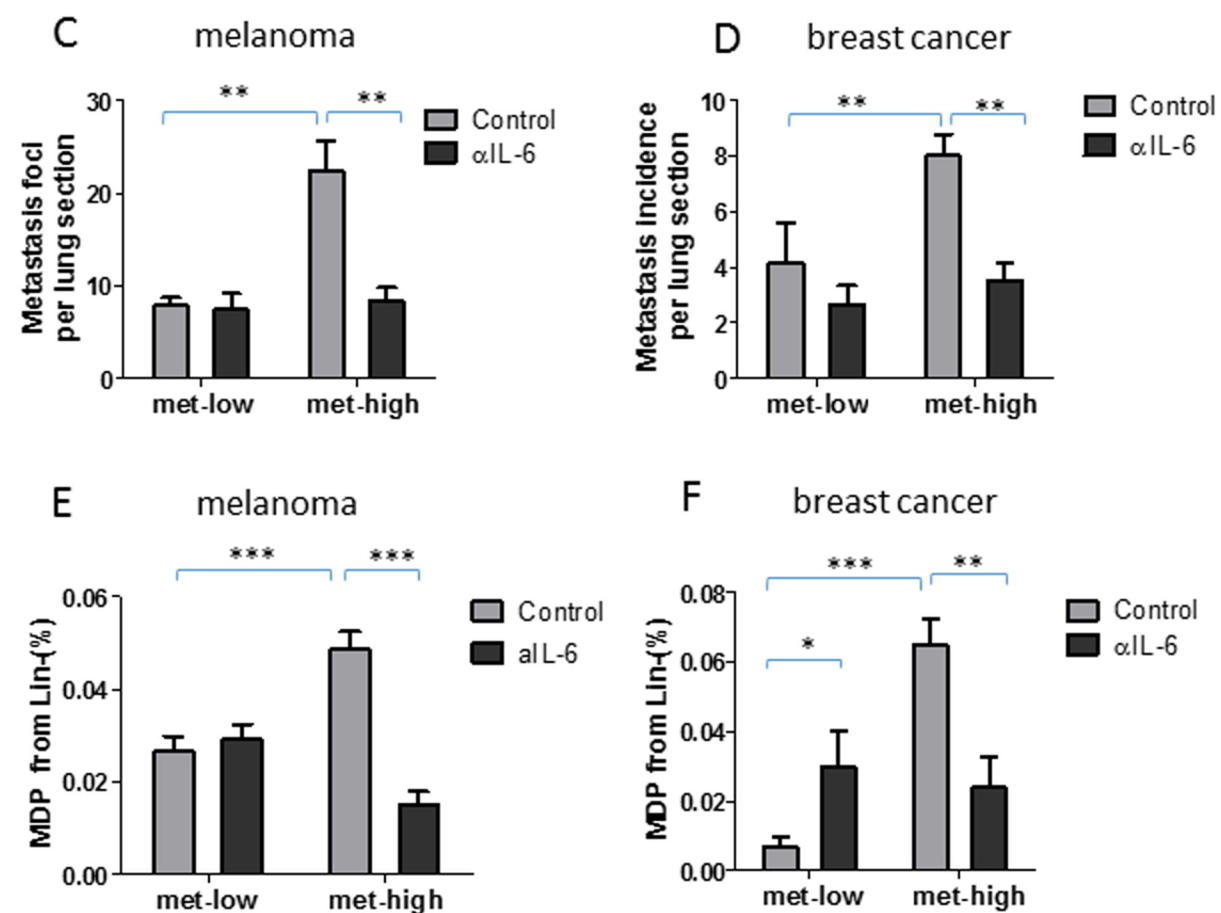

Fig.6

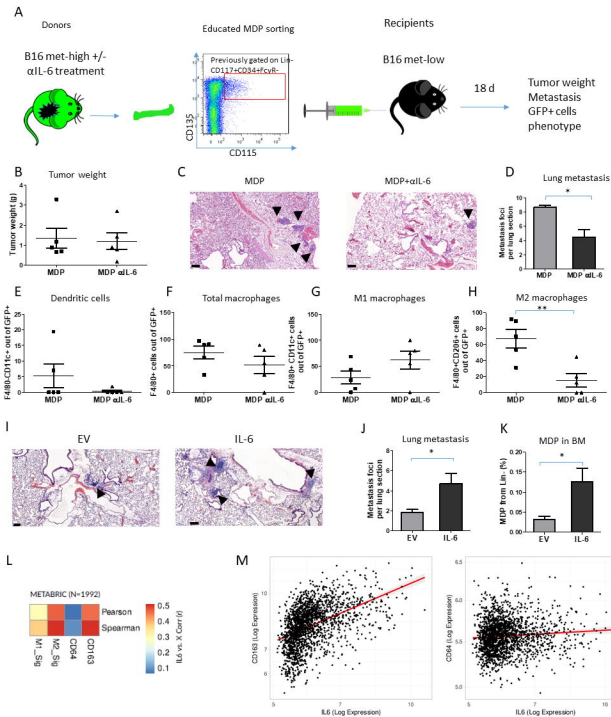

Source: http://biorxiv.org/content/10.1101/2020.08.25.266189v1.full.pdf
